# Supplementary material for: Promoting electrocatalytic nitrogen reduction by introducing low-spin sites in ferromagnetic single-atom alloys
Source: Royal Society of Chemistry journal article supplement (doi:10.1039/d4ta04094e), 2024-01-01
Supplement: d4ta04094e1.pdf [file d4ta04094e1.pdf]

## Supplementary information

# Promoting electrocatalytic nitrogen reduction by introducing low-spin sites in ferromagnetic single-atom alloys

*Yiming Ren, Peiyao Bai, Hongguang Wang, Shilin Wei, and Lang Xu\**

MOE Key Laboratory of Coal Processing and Efficient Utilization, School of Chemical  
Engineering and Technology, China University of Mining and Technology, 1 Daxue Road,  
Xuzhou, Jiangsu, 221116, China

\* E-mail address: lang.xu@cumt.edu.cn (L. Xu)

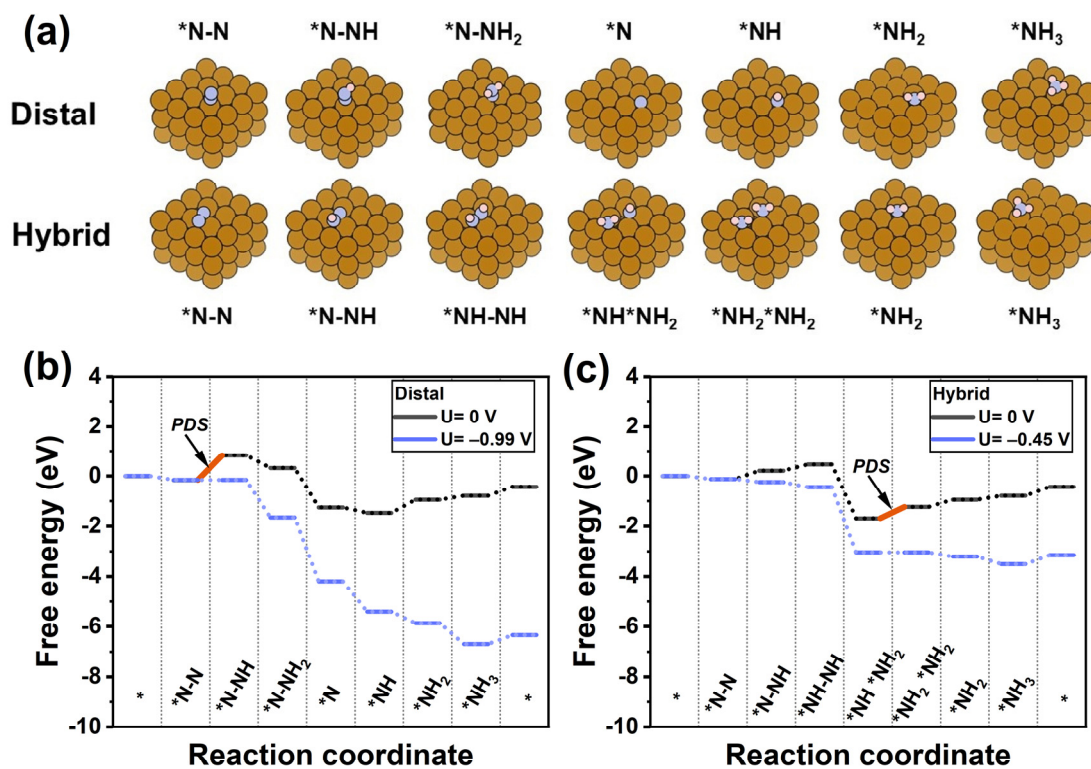

**Fig. S1** (a) The electrocatalytic nitrogen reduction reaction (e-NRR) pathways (distal and hybrid) and the intermediate configurations corresponding to the Top and Hollow 1&3 adsorption configurations of  $N_2$ . (b) Free energy diagram of the distal pathway. (c) Free energy diagram of the hybrid pathway.

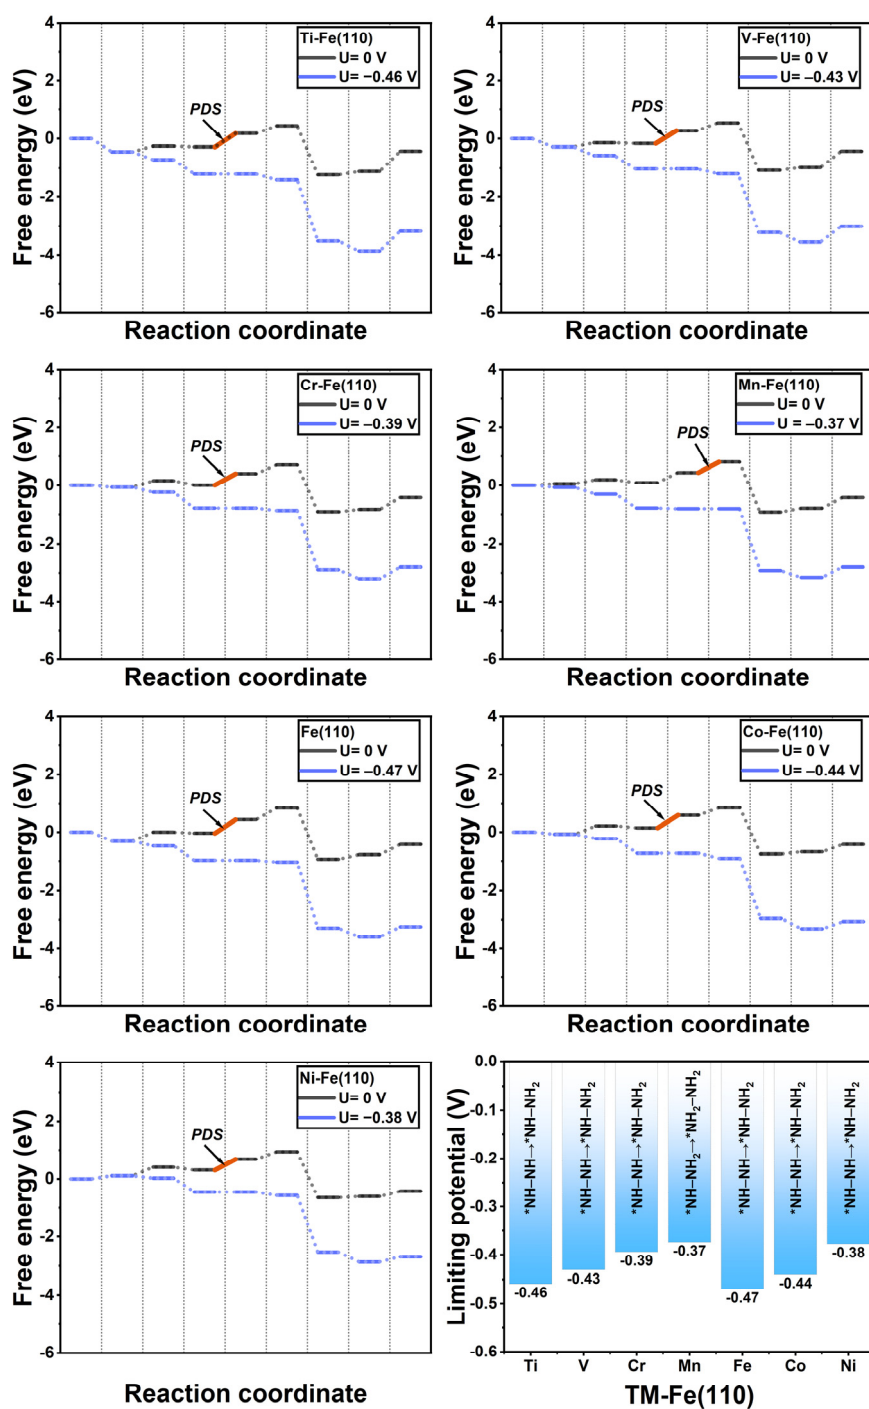

Fig. S2 Free energy diagrams of the intermediates of the fourth-period TM-Fe(110).

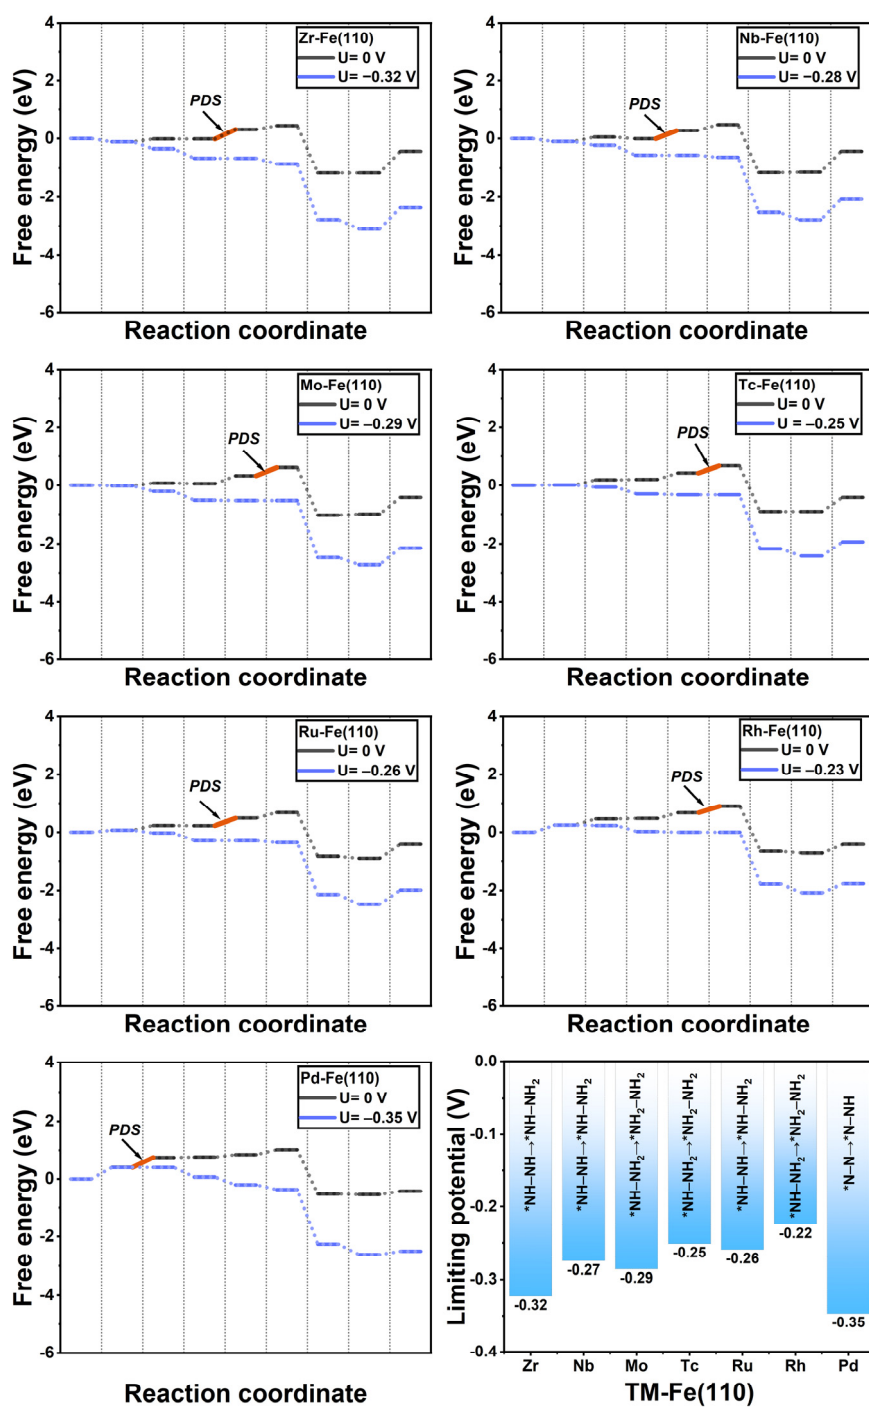

Fig. S3 Free energy diagrams of the intermediates of the fifth-period TM-Fe(110).



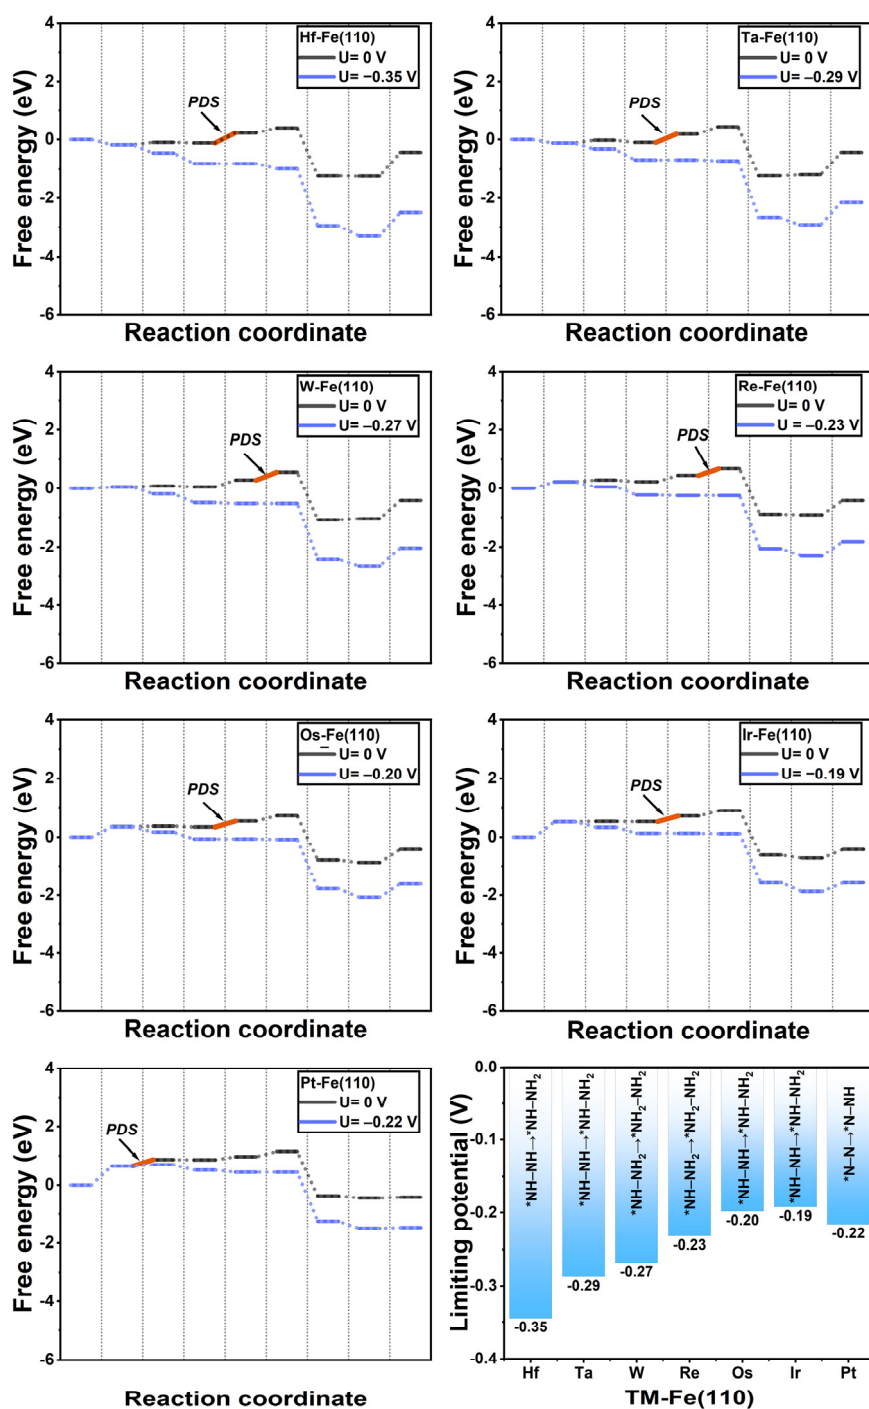

Fig. S4 Free energy diagrams of the intermediates of the sixth-period TM-Fe(110).

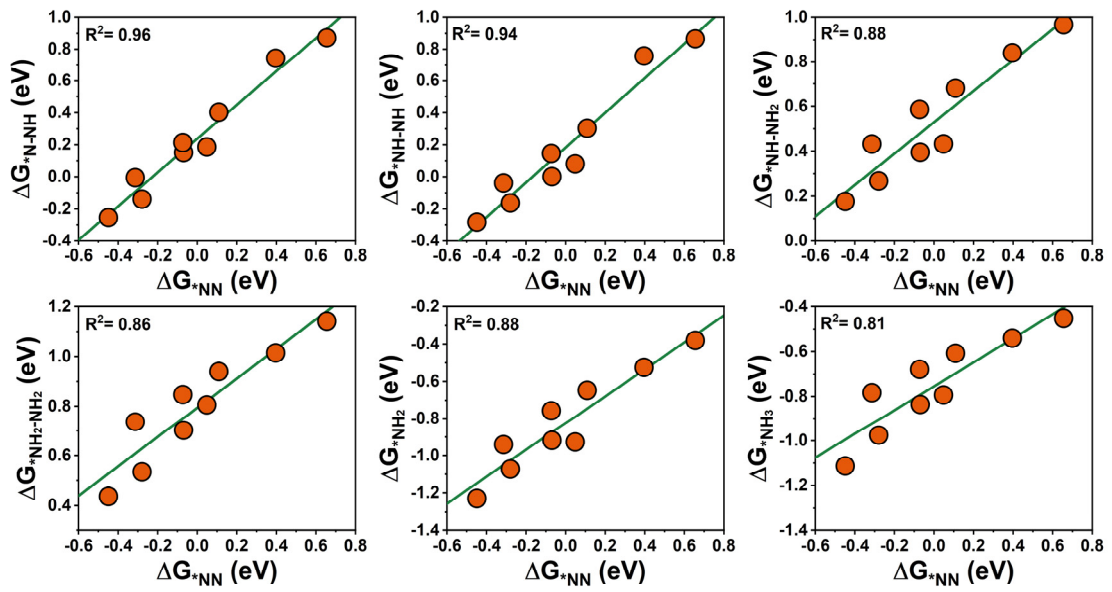

**Fig. S5** The scaling relationships between the adsorption Gibbs free energy of the NRR intermediate ( $\Delta G^*_{N_xH_y}$ ) and the  $N_2$  adsorption Gibbs free energy ( $\Delta G^*_{NN}$ ) of the fourth-period TM-Fe(110), Pd-Fe(110) and Pt-Fe(110).

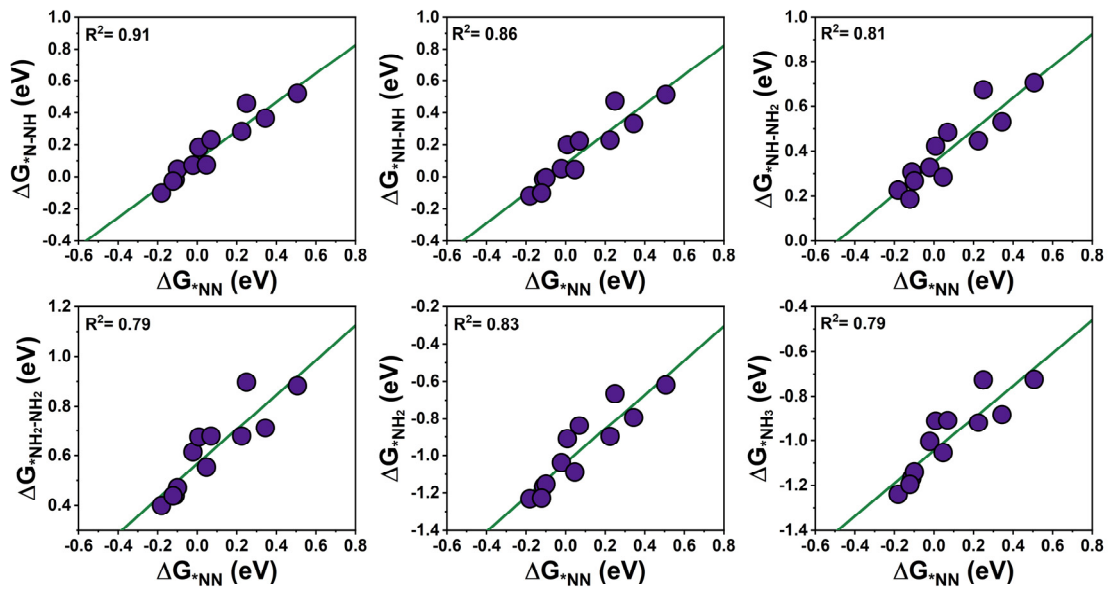

**Fig. S6** The scaling relationships between the  $\Delta G^*_{N_xH_y}$  and  $\Delta G^*_{NN}$  of the fifth- and sixth-period TM-Fe(110), excluding Pd-Fe(110) and Pt-Fe(110).

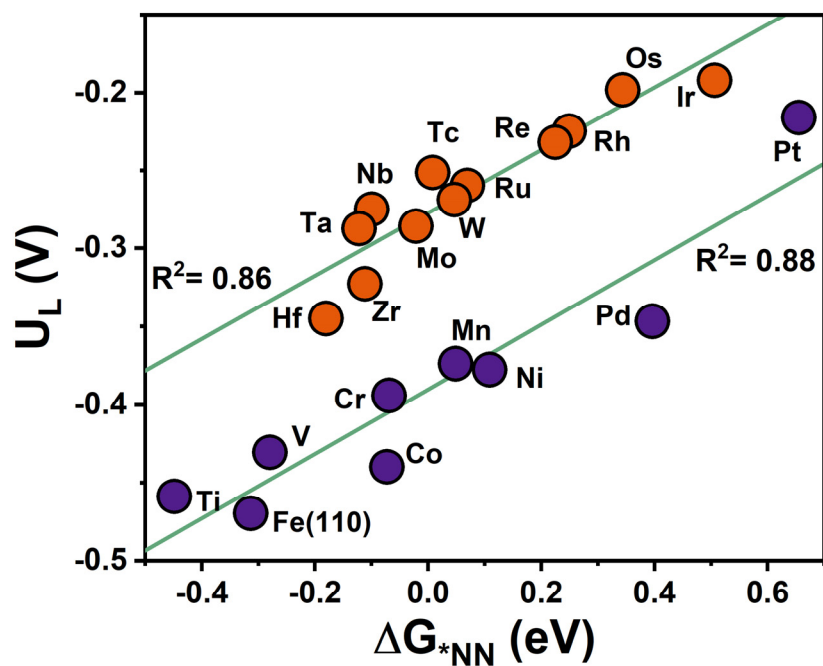

**Fig. S7** The scaling relationships between  $\Delta G_{*NN}$  and the limiting potential of the potential-determining step ( $U_L$ ) of TM-Fe(110).

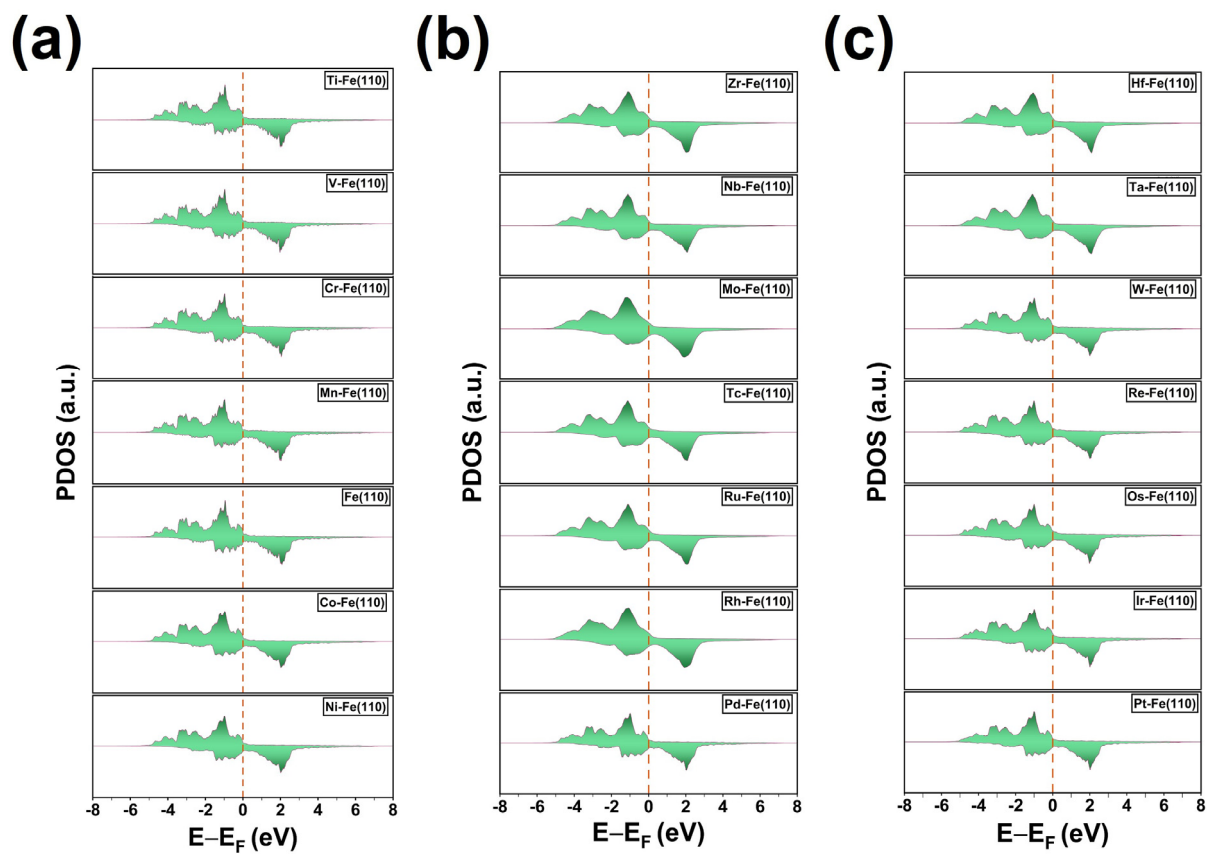

**Fig. S8** The d-orbital projected density of states (PDOS) of the fourth-, fifth- and sixth-period TM-Fe(110).

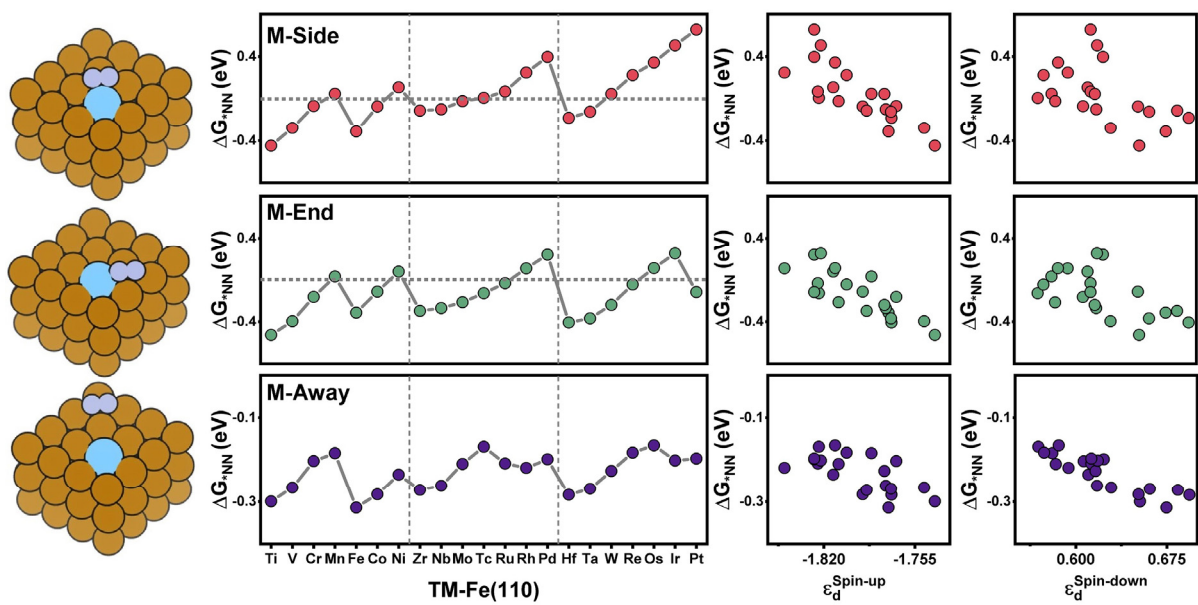

**Fig. S9** Three N<sub>2</sub> adsorption configurations (M-Side, M-End and M-Away) and  $\Delta G_{NN}^*$  of the catalysts as well as the relationships between  $\Delta G_{NN}^*$  and spin d-band center of the catalysts ( $\epsilon_d$ ).

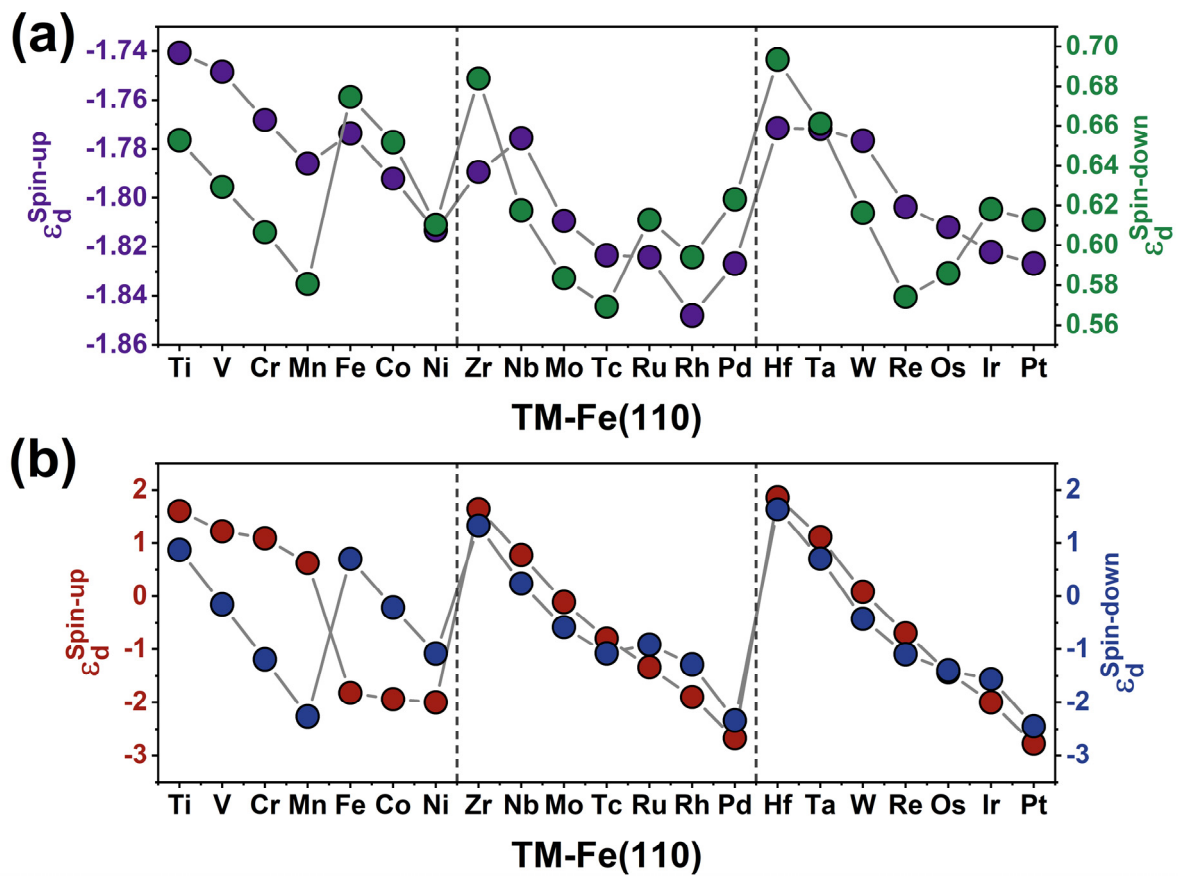

**Fig. S10** (a) The values of the spin-up and spin-down d-band centers of TM-Fe(110). (b) The spin-up and spin-down d-band centers of the dopants.



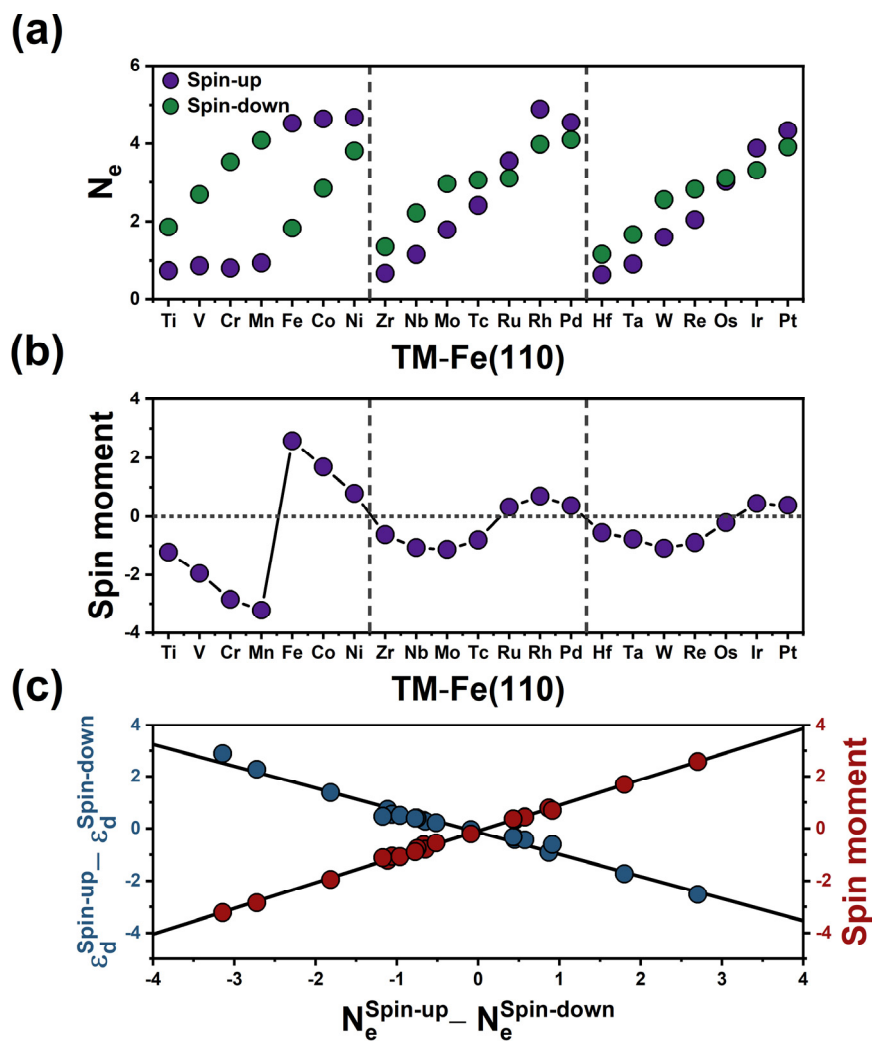

**Fig. S11** The electronic structures of the dopants in the TM-Fe(110) catalysts: (a) the number of spin-up and spin-down electrons ( $N_e$ ), (b) the value of the spin moments, (c) the scaling relationships between the difference in the number of spin d-electrons and the difference in the spin d-band centers and the spin moments.

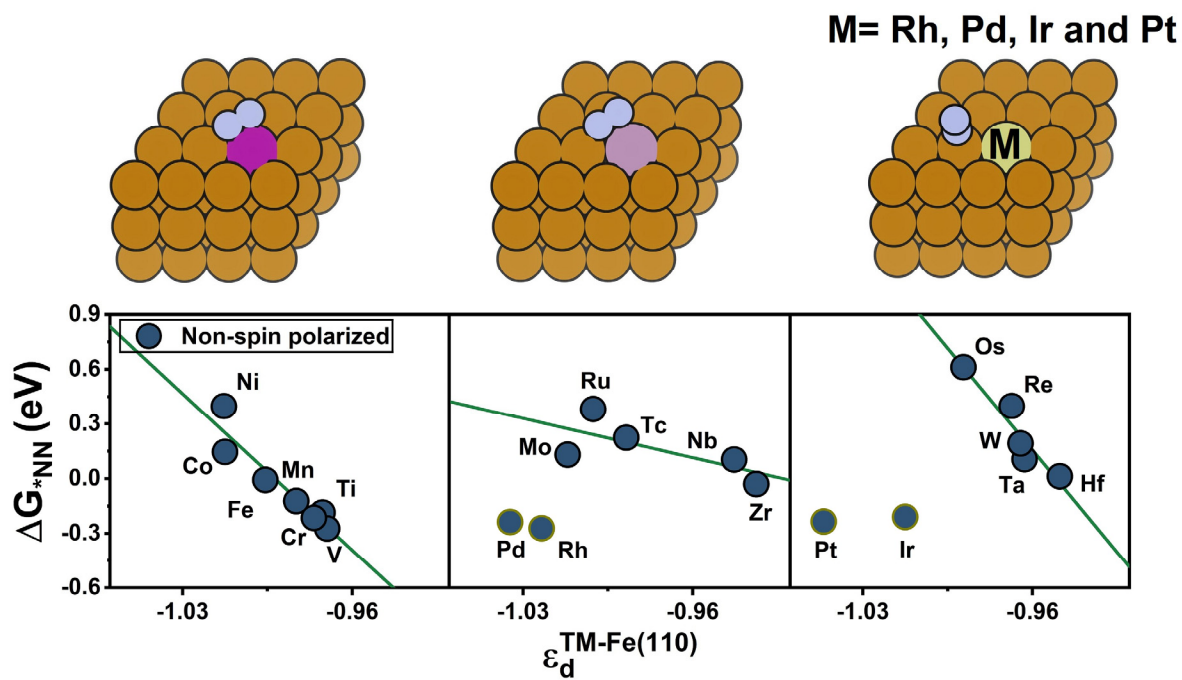

**Fig. S12** The scaling relationships between  $\Delta G_{*NN}$  and the d-band centers of the fourth-, fifth-, and sixth-period catalysts in non-spin polarization calculations.

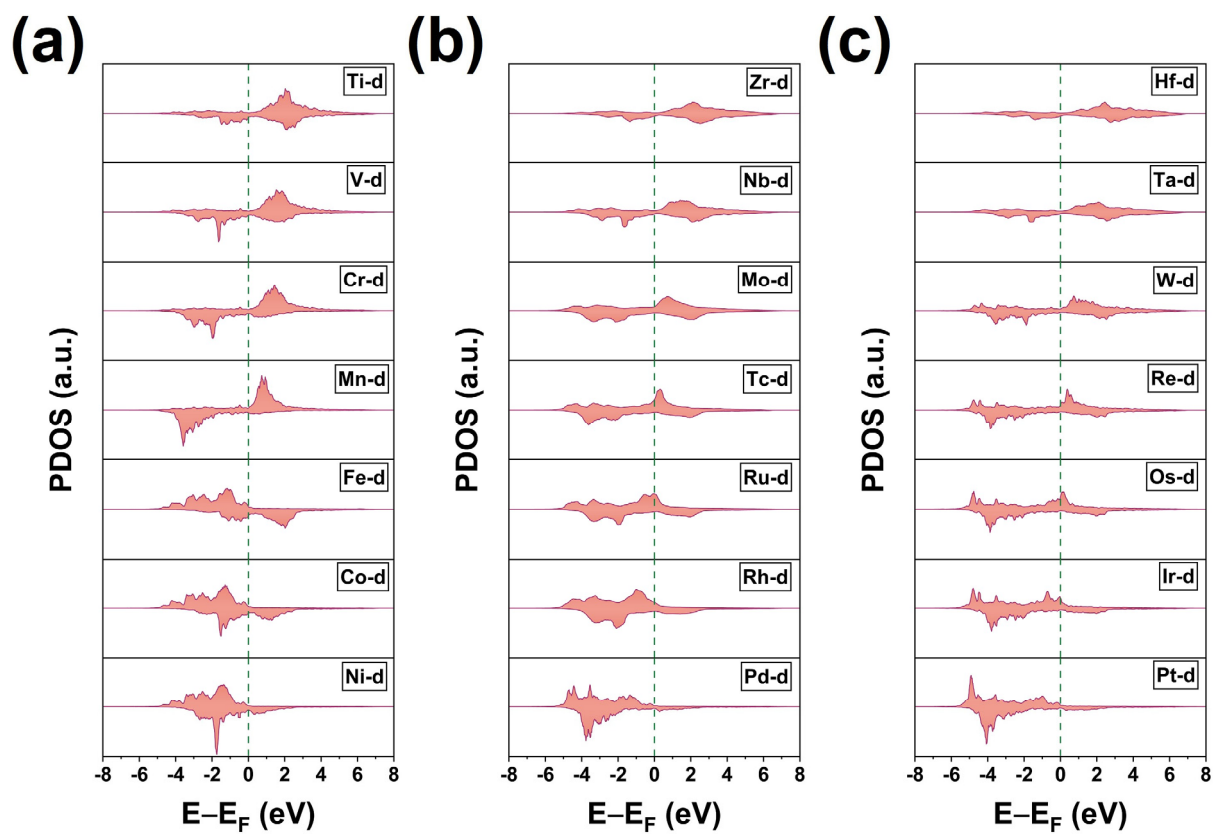

**Fig. S13** The d-orbital PDOS of the dopants of the fourth-, fifth-, and sixth-period TM-Fe(110).

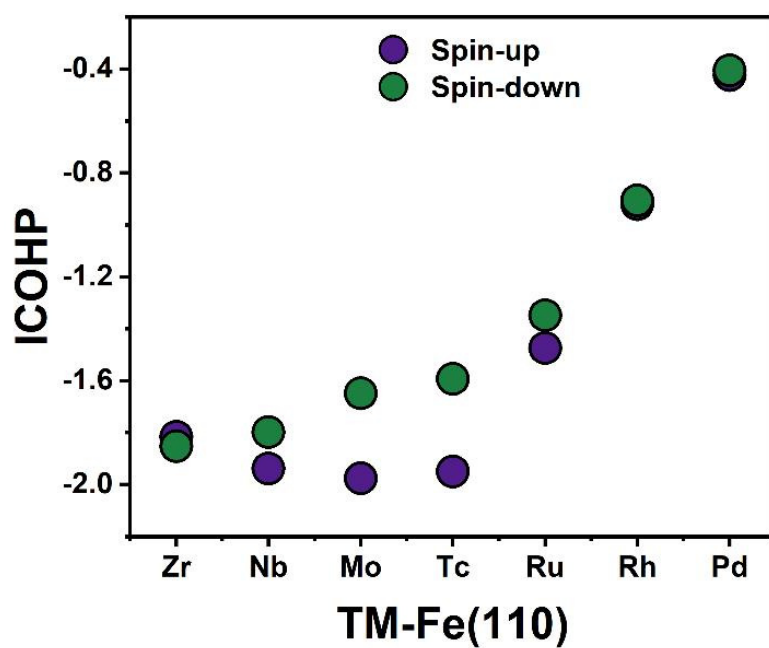

**Fig. S14** Integrated projected crystal orbital Hamiltonian population (ICOHP) values of the interaction between the TM sites and N<sub>2</sub> of the fifth-period TM-Fe(110).

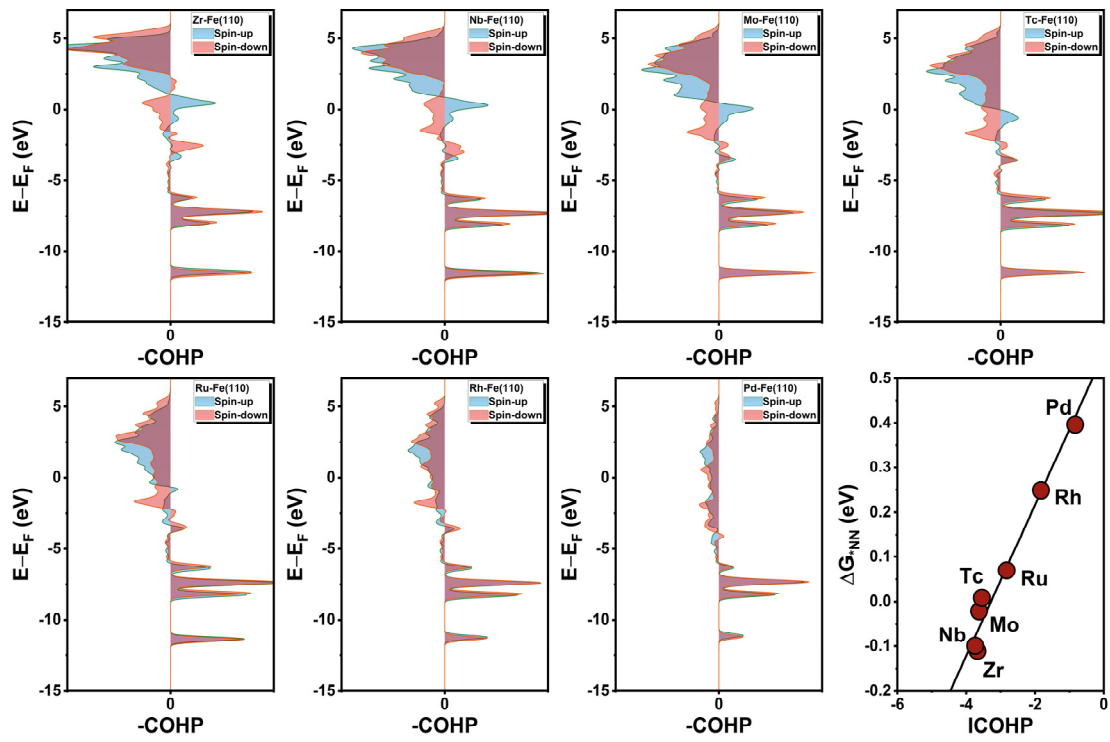

**Fig. S15** For the fifth-period TM-Fe(110), the projected crystal orbital Hamiltonian population (COHP) diagrams of the dopants with N<sub>2</sub> as well as the relationship between the ICOHP and  $\Delta G^*_{NN}$ .

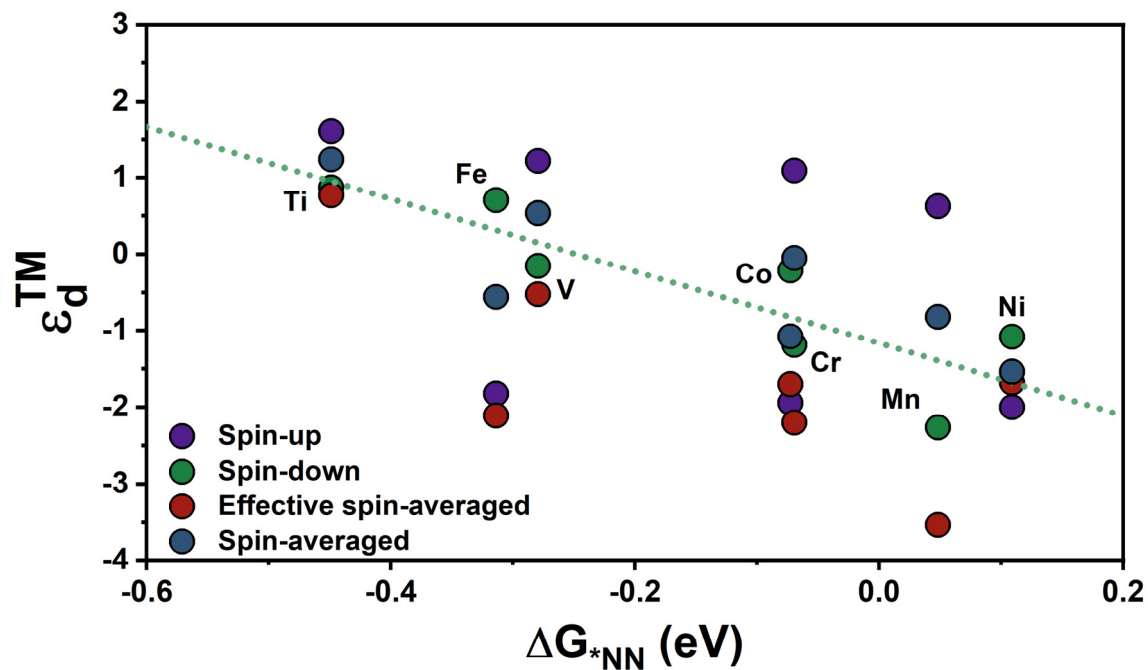

**Fig. S16** The relationship between the spin d-band centers of the dopants ( $\epsilon_d^{TM}$ ) and the  $\Delta G^*_{NN}$  of the fourth-period TM-Fe(110).

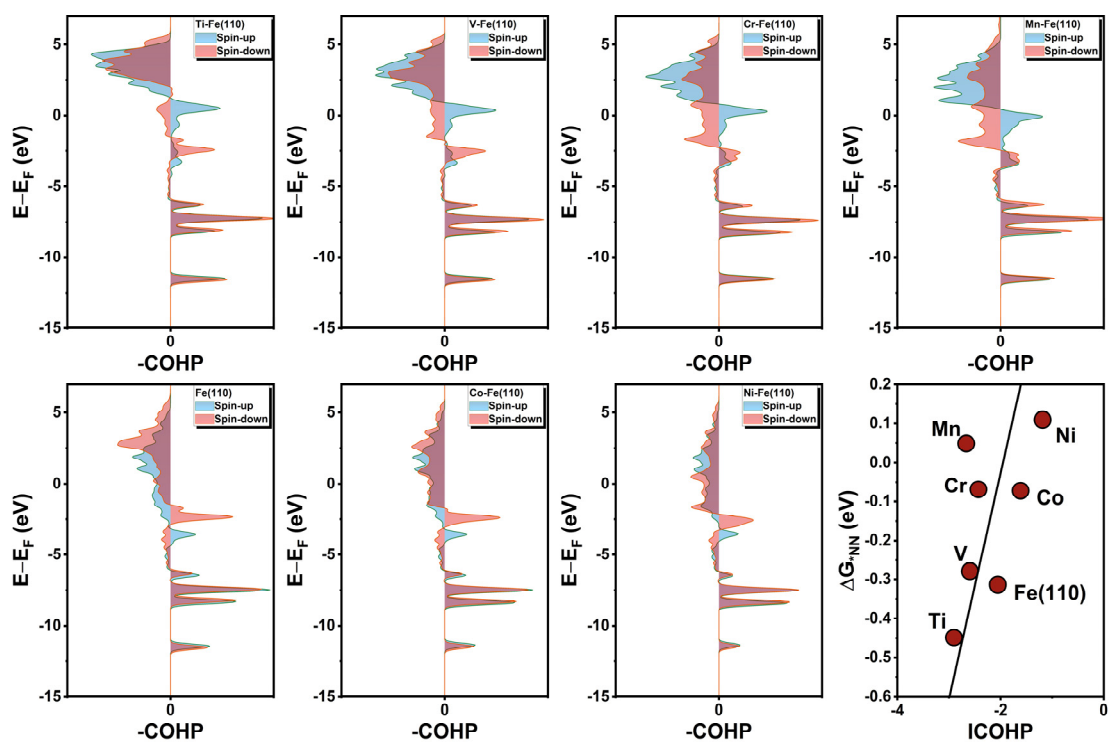

**Fig. S17** For the fourth-period TM-Fe(110) catalysts, the projected COHP diagrams of the dopants with  $N_2$  as well as the relationship between the ICOHP and  $\Delta G_{NN}^*$ .



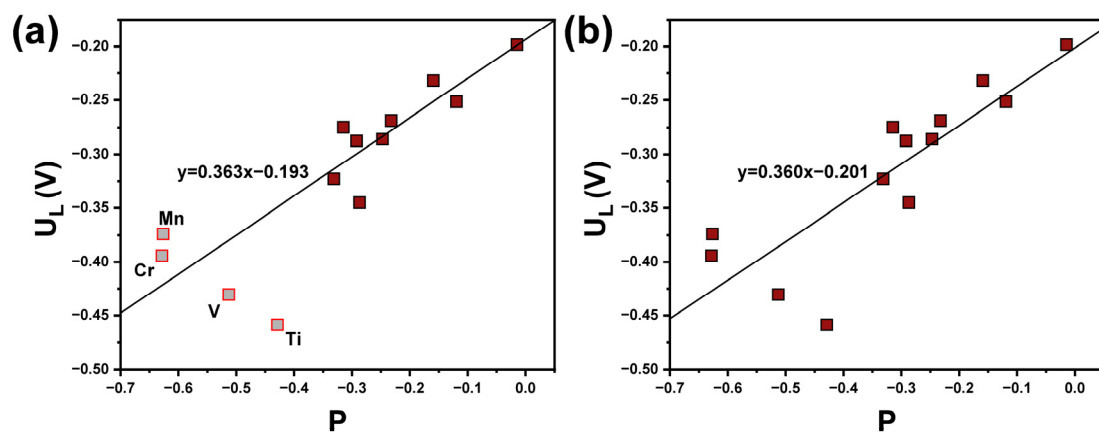

**Fig. S18** (a) Excluding Ti, V, Cr and Mn for linear fitting. (b) Including Ti, V, Cr and Mn for linear fitting.

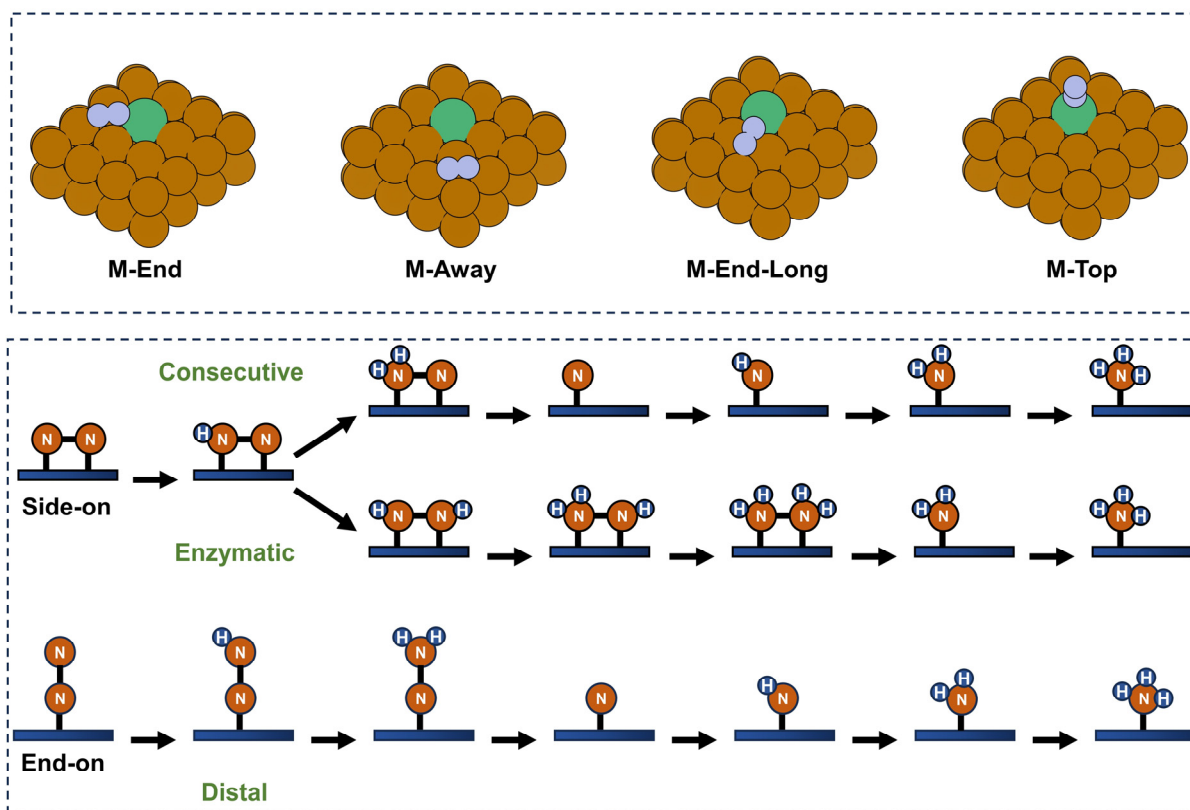

**Fig. S19** The four N<sub>2</sub> adsorption configurations on the surfaces of TM-Fe(110) and the reaction pathways corresponding to the side-on and end-on adsorptions.

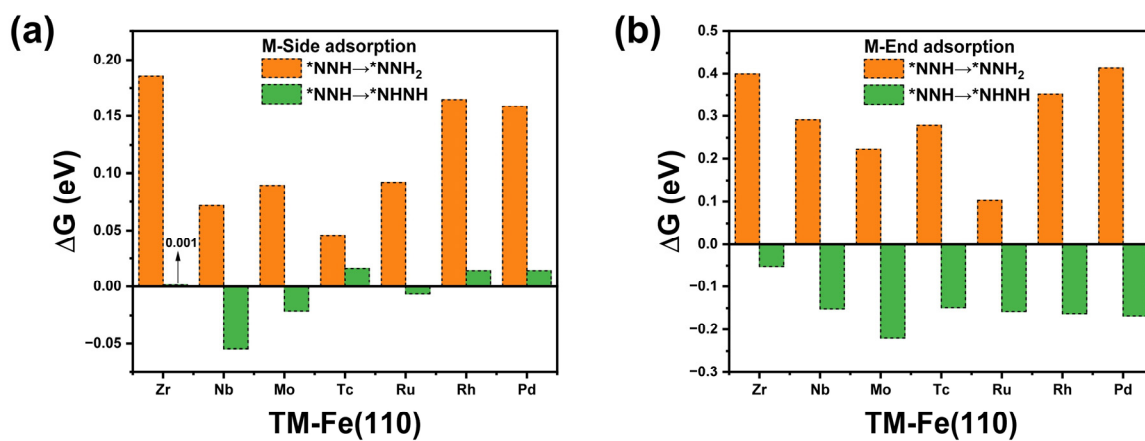

**Fig. S20** Gibbs free energy changes ( $\Delta G$ ) for the  $*\text{NNH} \rightarrow *\text{NNH}_2$  and  $*\text{NNH} \rightarrow *\text{NHNH}$  processes. In the e-NRR process with the M-Side and M-End adsorption configurations, the  $*\text{NNH}$  intermediates tend to form the  $*\text{NHNH}$  intermediates after the PCET process.

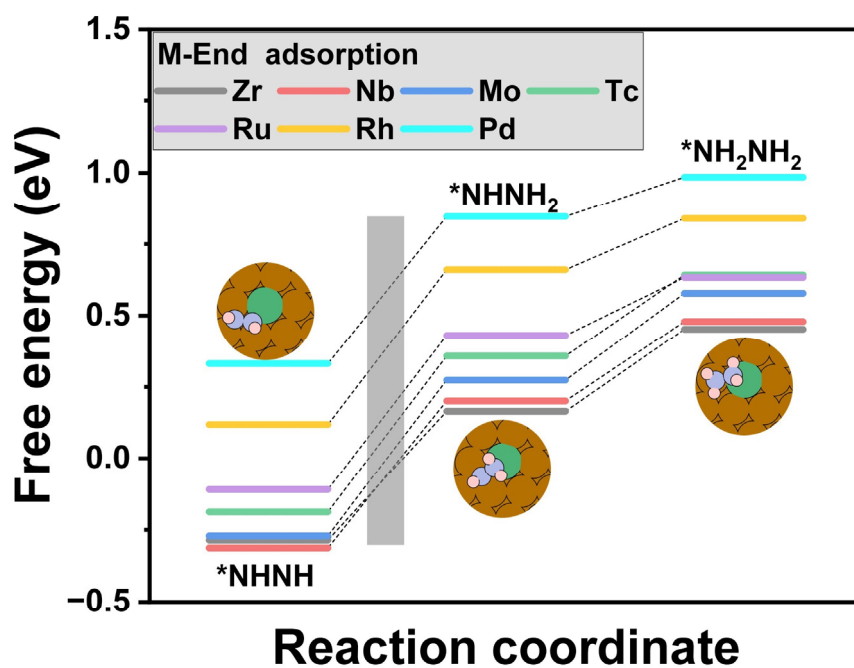

**Fig. S21** In the enzymatic pathway corresponding to the M-End adsorption configuration, the  $*\text{NHNH} \rightarrow *\text{NHNH}_2$  processes have the higher energy barrier than the PDS of the enzymatic pathway corresponding to the M-Side adsorption configuration.

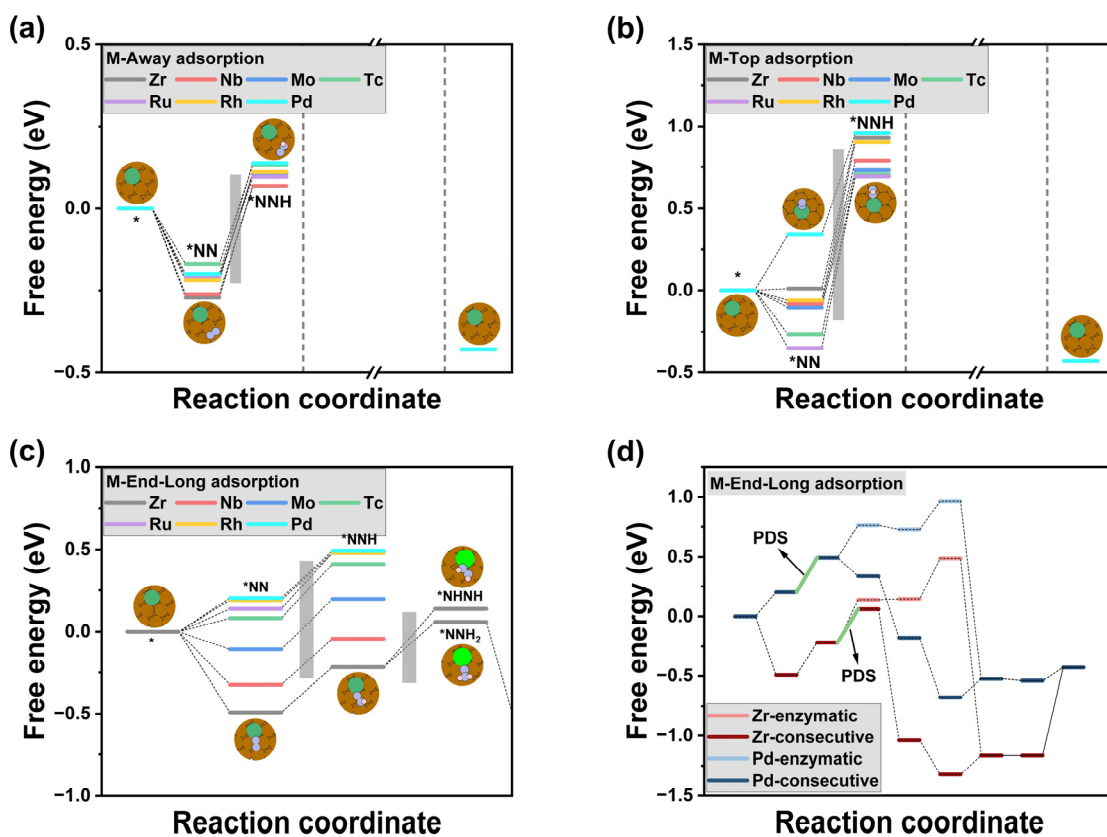

**Fig. S22** (a) and (b) In the reaction pathway corresponding to the M-Away and M-Top adsorption configurations, the  $*NN \rightarrow *NNH$  processes have the higher energy barrier than the PDS of the enzymatic pathway corresponding to the M-Side adsorption configuration. Therefore, the DFT energies of the reaction intermediates after the  $*NNH$  intermediate are not calculated. (c) and (d) In the reaction pathway corresponding to the M-End-Long adsorption configuration, the  $*NN \rightarrow *NNH$  processes of Pd-Fe(110) and the  $*NNH \rightarrow *NNH_2$  processes of Zr-Fe(110) have the lower energy barrier than the PDS of the enzymatic pathway corresponding to the M-Side adsorption configuration.

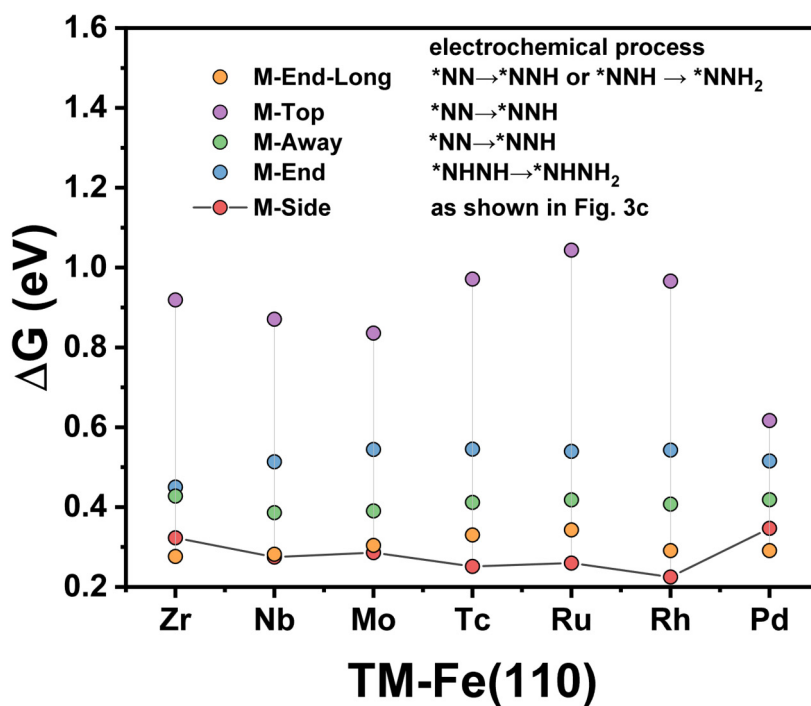

**Fig. S23** In the enzymatic pathway corresponding to the M-side adsorption configuration, the  $\Delta G$  is the energy barrier for the PDS. And in the pathway corresponding to the other four  $N_2$  adsorption conformations, the  $\Delta G$  is the energy barrier for the given electrochemical process, which is less than or equal to the energy barrier of the PDS.

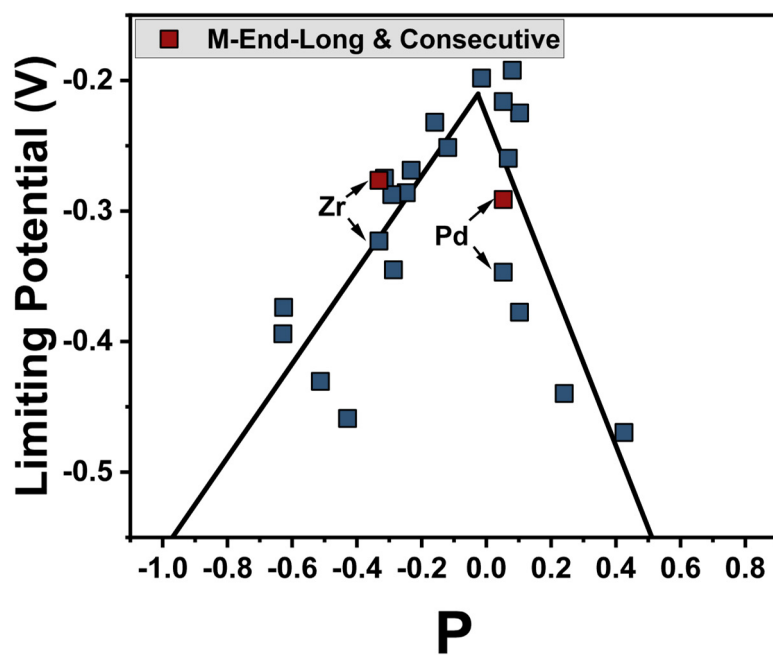

**Fig. S24** The limiting potentials of the optimal reaction pathways for Zr-Fe(110) and Pd-Fe(110) remain close to the volcano curve.
